# Supplementary material
Source: Springer Nature journal article supplement (https://www.springermedizin.de/resource/supplementary/12943_2009_618_MOESM8_ESM.pdf/9554420)

**a**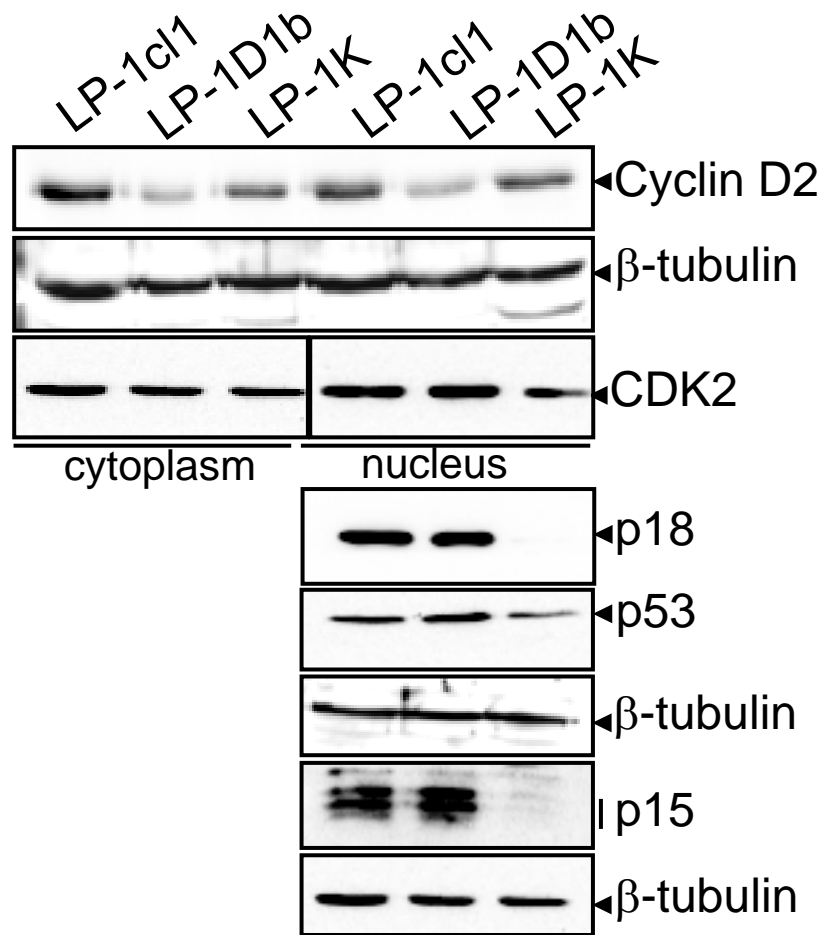**b**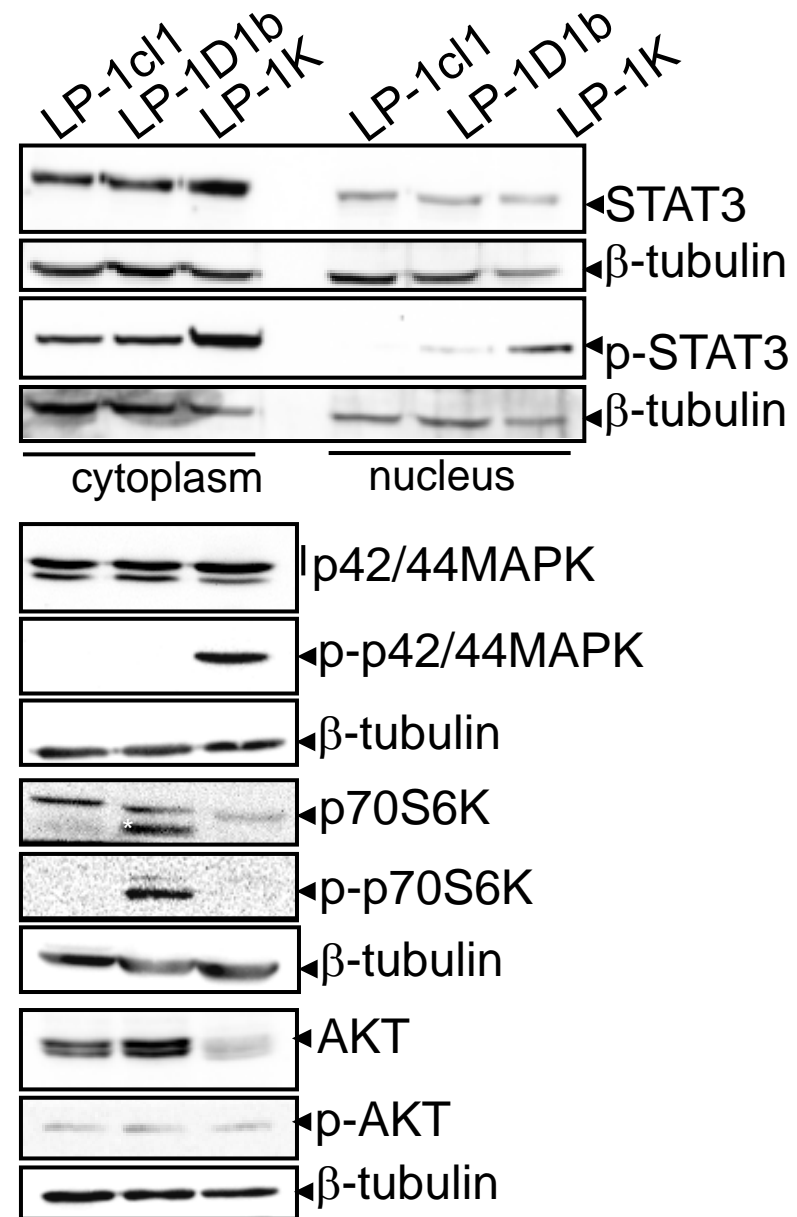

Supplement: MOESM8 [file 9554420]
